# Supplementary material for: Advanced Liver Fibrosis Is Associated with Chronic Kidney Disease in Patients with Type 2 Diabetes Mellitus and Nonalcoholic Fatty Liver Disease
Source: PubMed Central journal article supplement — Diabetes Metab J. 2022 Jan 26;46(4):630–9. doi: 10.4093/dmj.2021.0130 (PMC9353562; doi:10.4093/dmj.2021.0130), 2022-01-26
Supplement: dmj-2021-0130-suppl3.pdf [file dmj-2021-0130-suppl3.pdf]

**Supplementary Table 3.** Multivariable Cox regression analyses showing associations of advanced liver fibrosis (defined by FIB4 index) and the risk of incident CKD among adults with type 2 diabetes mellitus and NAFLD (defined by HSI)

|                    | HR   | 95% CI    | P value |
|--------------------|------|-----------|---------|
| Crude hazard ratio | 2.71 | 1.80–4.08 | <0.001  |
| Model 1            | 1.74 | 1.12–2.72 | 0.014   |
| Model 2            | 1.69 | 1.08–2.65 | 0.023   |
| Model 3            | 1.65 | 1.05–2.60 | 0.029   |
| Model 4            | 1.75 | 1.10–2.79 | 0.019   |

Model 1: adjustment for age (age was applied as a categorical variable with a cutoff value of 65), sex, and body mass index; Model 2: Model 1+adjustment for duration of diabetes, systolic blood pressure, hypertension, glycosylated hemoglobin level, total cholesterol level, and estimated glomerular filtration rate; Model 3: Model 2+adjustments for use of sulfonylurea, insulin, statin, and angiotensin converting enzyme inhibitor or angiotensin II receptor blockers; and Model 4: Model 3+adjustments for log high-sensitive C-reactive protein level and rate constant for plasma glucose disappearance (KITT) value. FIB-4, fibrosis-4; CKD, chronic kidney disease; NAFLD, nonalcoholic fatty liver disease; HSI, hepatic fibrosis index; HR, hazard ratio; CI, confidence interval.
